# Supplementary material for: Effectiveness of movement-based animal signals is a function of display structure and habitat characteristics: simulations of Australian dragons
Source: Research Square preprint supplement (doi:10.21203/rs.3.rs-124579/v1), 2020-12-15
Supplement: Supplementary file 1 [file 023be045843b227235482e29.pdf]

## Supplementary material accompanying

# Effectiveness of Movement-based animal signals is a function of display structure and habitat characteristics: simulations of Australian dragons

Xue Bian<sup>1</sup>, Angela Pinilla<sup>2</sup>, Tom Chandler<sup>2</sup>, Richard Peters<sup>1\*</sup>

<sup>1</sup>Animal Behaviour Group  
Department of Ecology, Environment and Evolution  
La Trobe University  
Melbourne, VIC, Australia

<sup>2</sup>Faculty of Information Technology  
Monash University  
Caulfield East, VIC, Australia

\*Correspondence:

Dr. Richard Peters

Email: [richard.peters@latrobe.edu.au](mailto:richard.peters@latrobe.edu.au)

**Figure S1** | Species and habitats used in the present paper. *Left column*: the typical signalling sites at which the target species are usually seen. *Right column*: general habitat structure and representative plants found in the habitats of all of the study species. (a) *Amphibolurus muricatus* are usually found basking on fallen wood. The habitat is densely vegetated with tall grasses and shrubs. (b) *Gowidon longirostris* inhabit arid rocky outcrops with sparsely vegetated eucalyptus and low shrubs, and are often seen displaying on rocks. (c) *Ctenophorus fordii* are small lizards that can be found between dense spinifex grass clumps in dry sandy areas of Victoria. (d) *Ctenophorus decresii* are colourful lizards that inhabit rocky ranges with typical vegetation of spinifex grass and eucalyptus, and is often seen displaying on rock surfaces.

*Figure on following page...*



(a)

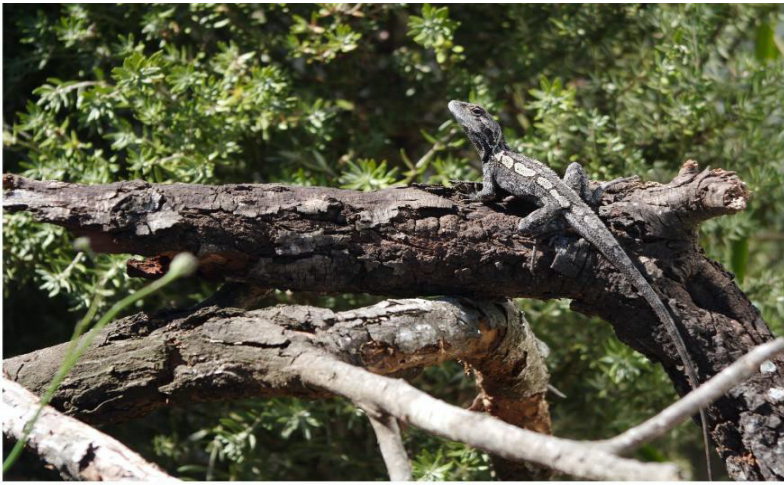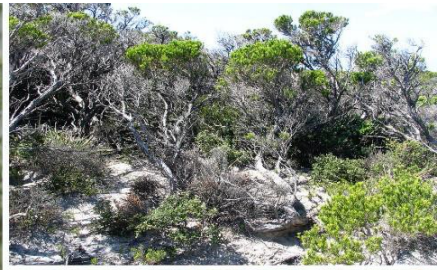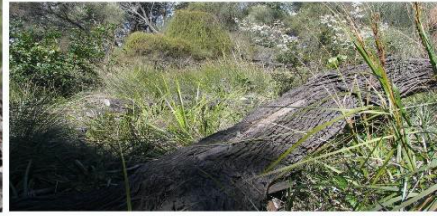

(b)

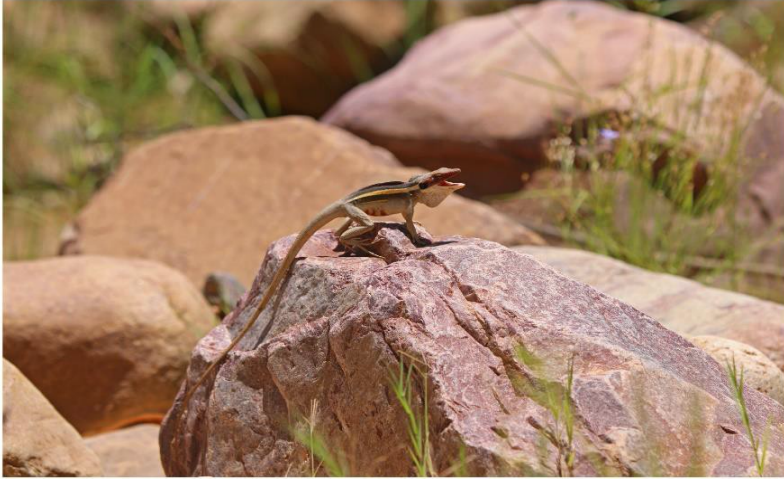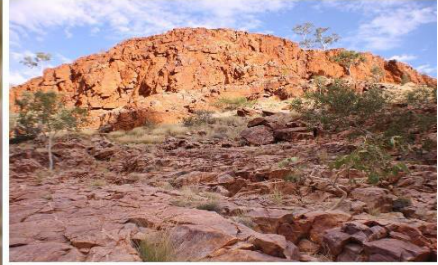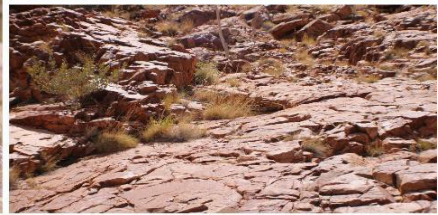

(c)

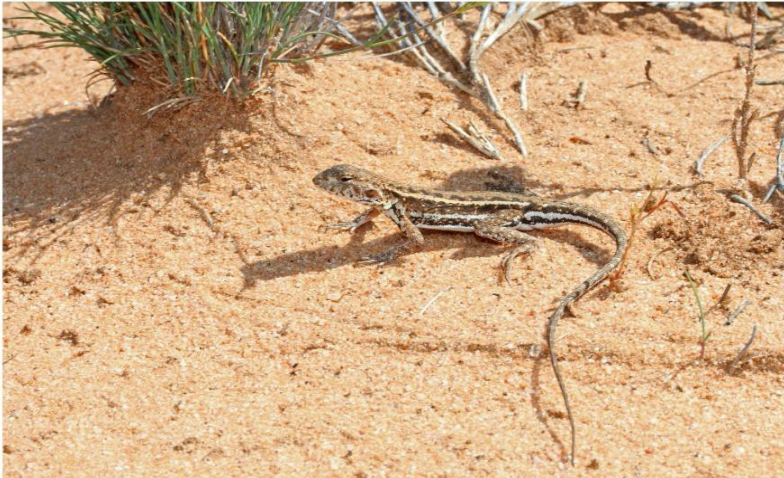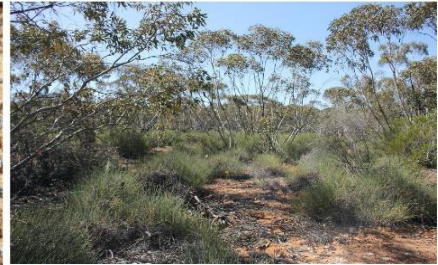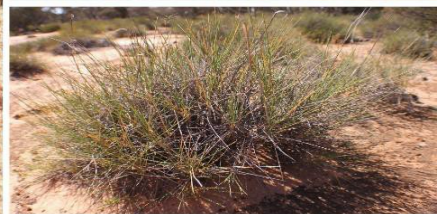

(d)

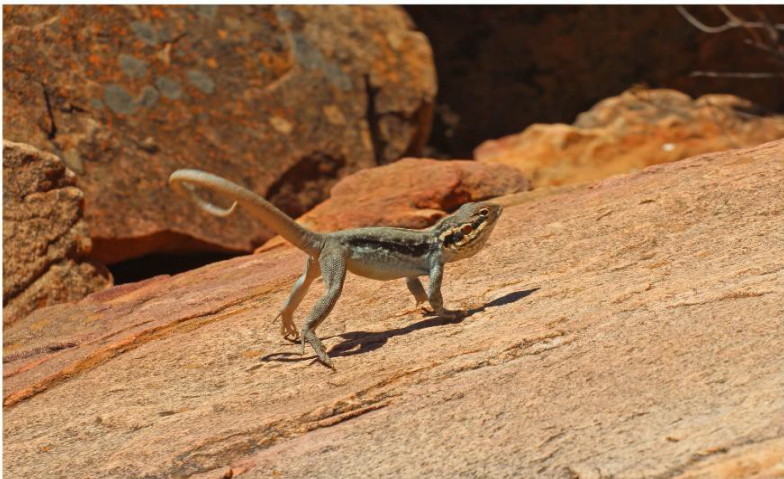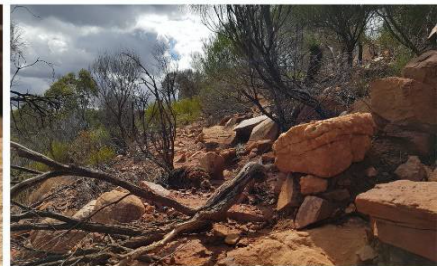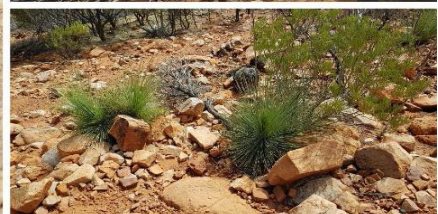



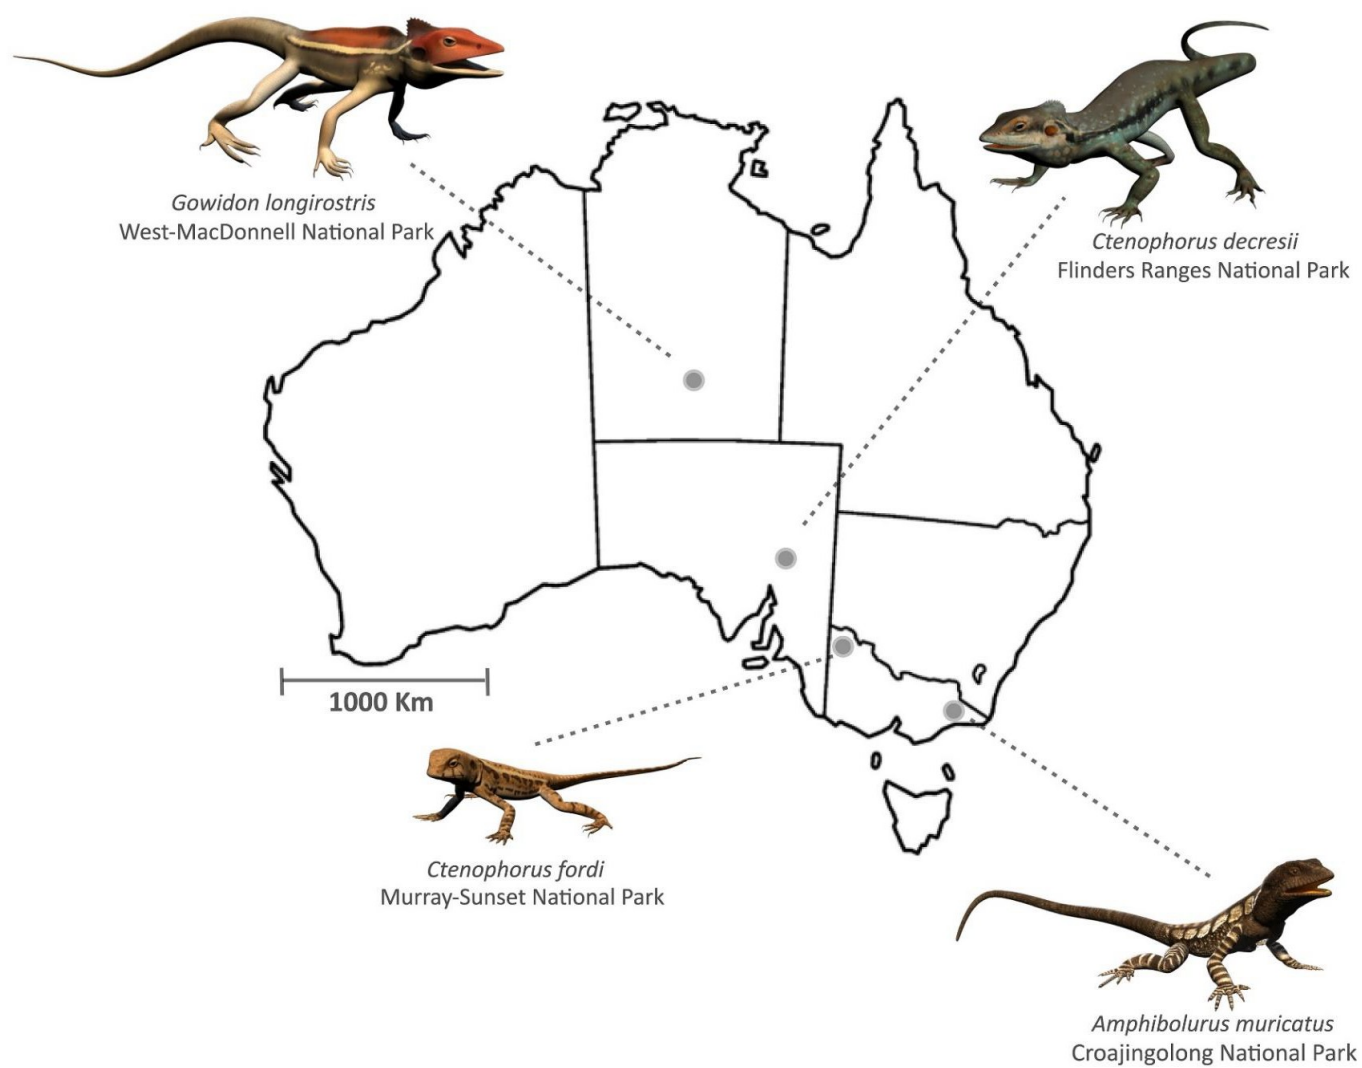

**Figure S2** | Models of target species and sampling sites in Australia.

(a) Croajinglong National Park

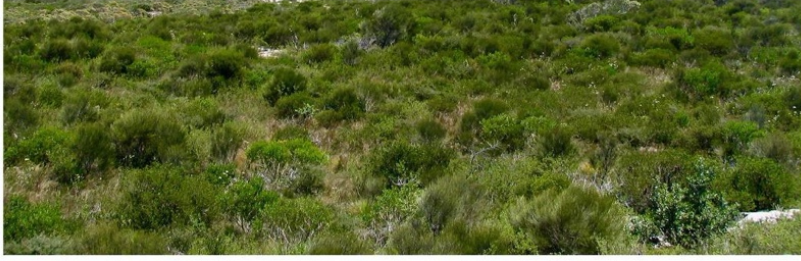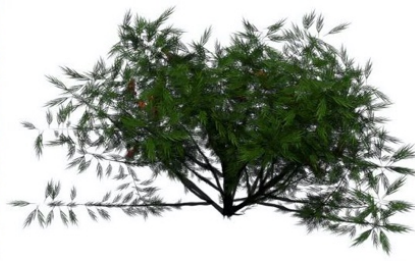

(b) West-MacDonnell National Park

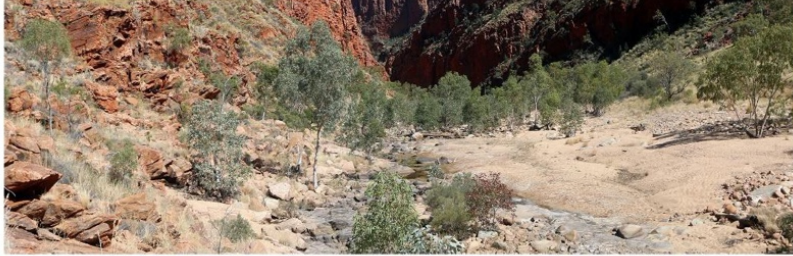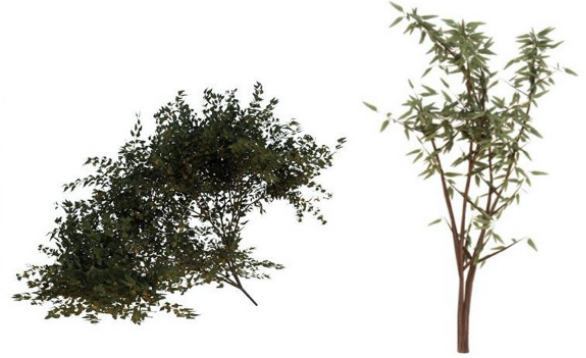

(c) Murray-Sunset National Park

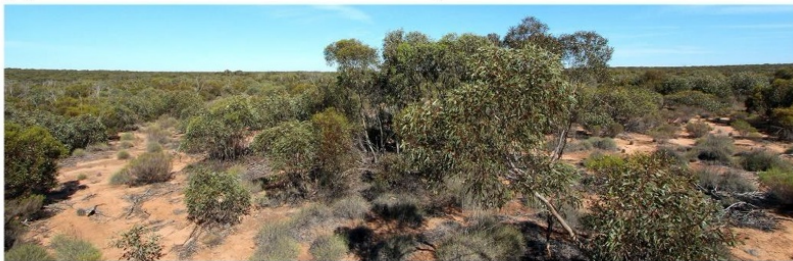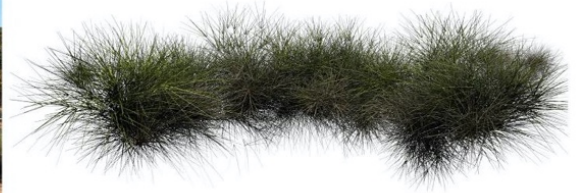

(d) Flinders Ranges National Park

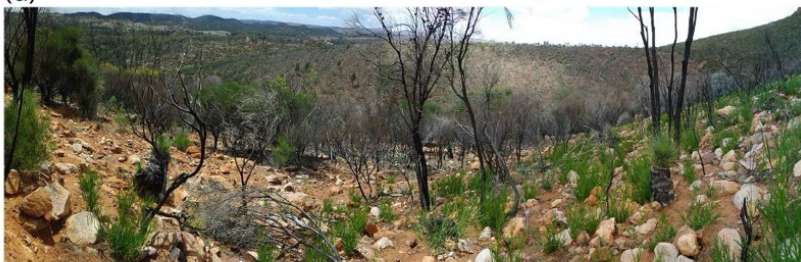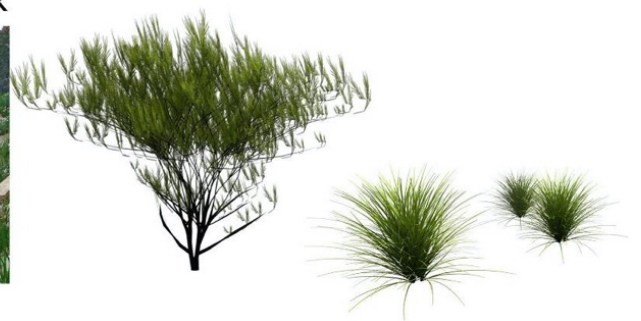

**Figure S3** | Study sites of the focal species (*left*) and 3D models of typical plant species featured in each habitat (*right*). (a) Habitat of *Amphibolurus muricatus* at the Croajinglong National Park is densely vegetated with grasses and typically featuring *Grevillea* sp. (b) Habitat of *Gowidon longirostris* at West-MacDonnell National Park, usually features low shrubs (*Acacias* sp.) and *Eucalyptus*. (c) Habitat of *Ctenophorus fordi* at Murray -Sunset National Park that typically featuring dense clumps of spinifex grass (*Triodia* sp.) and Mallee eucalyptus (*Eucalyptus* sp.). (d) Habitat of *Ctenophorus decresii* at the Flinders Ranges National Park, this habitat features saltbush (*Atriplex nummularia*) and spinifex grass (*Triodia* sp.)



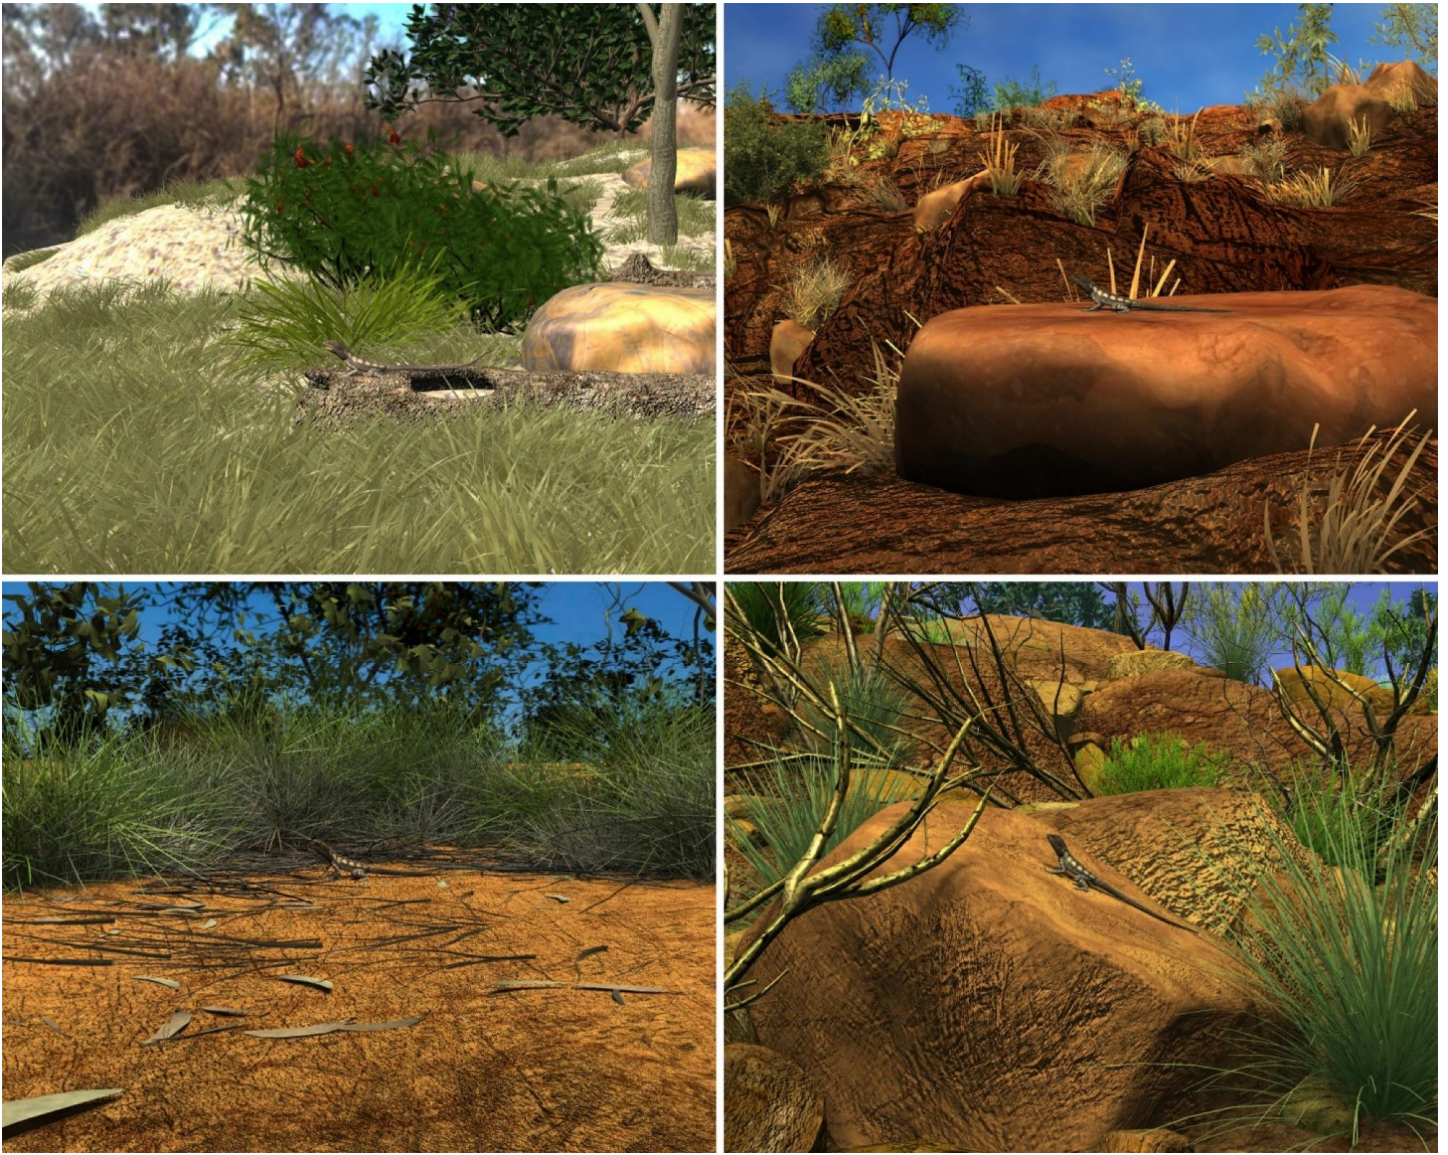

**Figure S4 |** (a) High resolution renders of one representative frame showing *A. muricatus* in all four habitats. Habitats are (clockwise from top-left): *A. muricatus*, *G. longirostrisi*, *C. decresii* and *C. fordii*.
